# Supplementary material for: Mg, Zn Substituted Calcium Phosphates—Thermodynamic Modeling, Biomimetic Synthesis in the Presence of Low-Weight Amino Acids and High Temperature Properties
Source: MDPI journal article supplement (doi:10.3390/ma16206638), 2023-10-11
Supplement: s1 [file s1]

## Supplementary material

Table S1 Thermodynamic formation constants of the aqueous species used in calculation

| Reaction                                                                                  | logK    | Source of logK |
|-------------------------------------------------------------------------------------------|---------|----------------|
| $\text{H}_2\text{O} \rightleftharpoons \text{OH}^- + \text{H}^+$                          | -13.997 | NIST46.4       |
| $\text{H}^+ + \text{CO}_3^{2-} \rightleftharpoons \text{HCO}_3^-$                         | 10.329  | PlumBus82      |
| $2\text{H}^+ + \text{CO}_3^{2-} \rightleftharpoons \text{H}_2\text{CO}_3$                 | 16.681  | NIST46.7       |
| $\text{H}^+ + \text{SO}_4^{2-} \rightleftharpoons \text{HSO}_4^-$                         | 1.99    | NIST46.7       |
| $\text{H}^+ + \text{PO}_4^{3-} \rightleftharpoons \text{HPO}_4^{2-}$                      | 12.375  | NIST46.7       |
| $2\text{H}^+ + \text{PO}_4^{3-} \rightleftharpoons \text{H}_2\text{PO}_4^-$               | 19.573  | NIST46.7       |
| $3\text{H}^+ + \text{PO}_4^{3-} \rightleftharpoons \text{H}_3\text{PO}_4$                 | 21.721  | NIST46.7       |
| $\text{H}^+ + \text{glycine}^- \rightleftharpoons \text{H}(\text{glycine})$               | 9.778   | NIST46.6       |
| $2\text{H}^+ + \text{glycine}^- \rightleftharpoons \text{H}_2(\text{glycine})^+$          | 12.128  | NIST46.6       |
|                                                                                           |         |                |
| $\text{Na}^+ + \text{OH}^- \rightleftharpoons \text{NaOH}$                                | 0.1     | NIST46.7       |
| $\text{Na}^+ + \text{Cl}^- \rightleftharpoons \text{NaCl}$                                | -0.3    | NIST46.7       |
| $\text{Na}^+ + \text{CO}_3^{2-} \rightleftharpoons \text{NaCO}_3^-$                       | 1.27    | NIST46.7       |
| $\text{Na}^+ + \text{H}^+ + \text{CO}_3^{2-} \rightleftharpoons \text{NaHCO}_3$           | 10.079  | NIST46.7       |
| $\text{Na}^+ + \text{H}^+ + \text{PO}_4^{3-} \rightleftharpoons \text{NaHPO}_4^-$         | 13.445  | NIST46.7       |
| $\text{Na}^+ + \text{PO}_4^{3-} + 2\text{H}^+ \rightleftharpoons \text{NaH}_2\text{PO}_4$ | 19.873  | NIST46.7       |
| $\text{Na}^+ + \text{PO}_4^{3-} \rightleftharpoons \text{NaPO}_4^{2-}$                    | 1.43    | NIST46.7       |
| $2\text{Na}^+ + \text{PO}_4^{3-} \rightleftharpoons \text{Na}_2\text{PO}_4^-$             | 1.16    | NIST46.7       |
| $2\text{Na}^+ + \text{PO}_4^{3-} + \text{H}^+ \rightleftharpoons \text{Na}_2\text{HPO}_4$ | 13.32   | NIST46.7       |
|                                                                                           |         |                |
| $\text{K}^+ + \text{H}_2\text{O} \rightleftharpoons \text{KOH} + \text{H}^+$              | -13.757 | NIST46.7       |
| $\text{K}^+ + \text{Cl}^- \rightleftharpoons \text{KCl}$                                  | -0.3    | NIST46.7       |
| $\text{K}^+ + \text{SO}_4^{2-} \rightleftharpoons \text{KSO}_4^-$                         | 0.85    | NIST46.7       |
| $\text{K}^+ + \text{H}^+ + \text{PO}_4^{3-} \rightleftharpoons \text{KHPO}_4^-$           | 13.255  | NIST46.7       |
| $\text{K}^+ + \text{PO}_4^{3-} \rightleftharpoons \text{KPO}_4^{2-}$                      | 1.43    | NIST46.7       |
| $2\text{K}^+ + \text{PO}_4^{3-} \rightleftharpoons \text{K}_2\text{PO}_4^-$               | 0.83    | NIST46.7       |
| $\text{K}^+ + \text{PO}_4^{3-} + 2\text{H}^+ \rightleftharpoons \text{KH}_2\text{PO}_4$   | 19.873  | NIST46.7       |
| $2\text{K}^+ + \text{PO}_4^{3-} + \text{H}^+ \rightleftharpoons \text{K}_2\text{HPO}_4$   | 13.44   | NIST46.7       |
|                                                                                           |         |                |
| $\text{Mg}^{2+} + \text{H}_2\text{O} \rightleftharpoons \text{MgOH}^+ + \text{H}^+$       | -11.397 | NIST46.7       |
| $\text{Mg}^{2+} + \text{Cl}^- \rightleftharpoons \text{MgCl}^+$                           | 0.6     | NIST46.7       |
| $\text{Mg}^{2+} + \text{CO}_3^{2-} \rightleftharpoons \text{MgCO}_3$                      | 2.92    | NIST46.7       |
| $\text{Mg}^{2+} + \text{H}^+ + \text{CO}_3^{2-} \rightleftharpoons \text{MgHCO}_3^+$      | 11.339  | NIST46.7       |
| $\text{Mg}^{2+} + \text{SO}_4^{2-} \rightleftharpoons \text{MgSO}_4$                      | 2.26    | NIST46.7       |

|                                                                                                     |         |                   |
|-----------------------------------------------------------------------------------------------------|---------|-------------------|
| $\text{Mg}^{2+} + \text{PO}_4^{3-} \rightleftharpoons \text{MgPO}_4^-$                              | 4.654   | Turner et al.1981 |
| $\text{Mg}^{2+} + \text{H}^+ + \text{PO}_4^{3-} \rightleftharpoons \text{MgHPO}_4$                  | 15.175  | NIST46.7          |
| $\text{Mg}^{2+} + 2\text{H}^+ + \text{PO}_4^{3-} \rightleftharpoons \text{MgH}_2\text{PO}_4^+$      | 21.2561 | NIST46.7          |
| $\text{Mg}^{2+} + \text{glycine}^- \rightleftharpoons \text{Mg}(\text{glycine})^+$                  | 2.08    | NIST46.6          |
|                                                                                                     |         |                   |
| $\text{Ca}^{2+} + \text{H}_2\text{O} \rightleftharpoons \text{CaOH}^+ + \text{H}^+$                 | -12.697 | NIST46.7          |
| $\text{Ca}^{2+} + \text{Cl}^- \rightleftharpoons \text{CaCl}^+$                                     | 0.4     | NIST46.7          |
| $\text{Ca}^{2+} + \text{H}^+ + \text{CO}_3^{2-} \rightleftharpoons \text{CaHCO}_3^+$                | 11.599  | NIST46.3          |
| $\text{Ca}^{2+} + \text{CO}_3^{2-} \rightleftharpoons \text{CaCO}_3$                                | 3.2     | NIST46.3          |
| $\text{Ca}^{2+} + \text{SO}_4^{2-} \rightleftharpoons \text{CaSO}_4$                                | 2.36    | NIST46.7          |
| $\text{Ca}^{2+} + \text{PO}_4^{3-} \rightleftharpoons \text{CaPO}_4^-$                              | 6.46    | Turner et al.1981 |
| $\text{Ca}^{2+} + \text{H}^+ + \text{PO}_4^{3-} \rightleftharpoons \text{CaHPO}_4$                  | 15.035  | NIST46.7          |
| $\text{Ca}^{2+} + 2\text{H}^+ + \text{PO}_4^{3-} \rightleftharpoons \text{CaH}_2\text{PO}_4^+$      | 20.923  | NIST46.7          |
| $\text{Ca}^{2+} + \text{glycine}^- \rightleftharpoons \text{Ca}(\text{glycine})^+$                  | 1.39    | NIST46.6          |
|                                                                                                     |         |                   |
| $\text{Zn}^{2+} + \text{H}_2\text{O} \rightleftharpoons \text{ZnOH}^+ + \text{H}^+$                 | -8.997  | NIST46.7          |
| $\text{Zn}^{2+} + 2\text{H}_2\text{O} \rightleftharpoons \text{Zn}(\text{OH})_2 + 2\text{H}^+$      | -16.894 | NIST46.7          |
| $\text{Zn}^{2+} + 3\text{H}_2\text{O} \rightleftharpoons \text{Zn}(\text{OH})_3^- + 3\text{H}^+$    | -28.391 | NIST46.7          |
| $\text{Zn}^{2+} + 4\text{H}_2\text{O} \rightleftharpoons \text{Zn}(\text{OH})_4^{2-} + 4\text{H}^+$ | -41.188 | NIST46.7          |
| $2\text{Zn}^{2+} + \text{OH}^- \rightleftharpoons \text{Zn}_2\text{OH}^{3+}$                        | -8.997  | NIST46.7          |
| $\text{Zn}^{2+} + \text{Cl}^- \rightleftharpoons \text{ZnCl}^+$                                     | 0.46    | NIST46.7          |
| $\text{Zn}^{2+} + 2\text{Cl}^- \rightleftharpoons \text{ZnCl}_2$                                    | 0.6     | NIST46.3          |
| $\text{Zn}^{2+} + 3\text{Cl}^- \rightleftharpoons \text{ZnCl}_3^-$                                  | 0.510   | Turner et al.1981 |
| $\text{Zn}^{2+} + 4\text{Cl}^- \rightleftharpoons \text{ZnCl}_4^{2-}$                               | 0.2     | Turner et al.1981 |
| $\text{Zn}^{2+} + \text{CO}_3^{2-} \rightleftharpoons \text{ZnCO}_3$                                | 4.76    | NIST46.7          |
| $\text{Zn}^{2+} + \text{H}^+ + \text{CO}_3^{2-} \rightleftharpoons \text{ZnHCO}_3^+$                | 11.829  | NIST46.7          |
| $\text{Zn}^{2+} + 2\text{CO}_3^{2-} \rightleftharpoons \text{Zn}(\text{CO}_3)_2^{2-}$               | 7.3     | NIST46.7          |
| $\text{Zn}^{2+} + \text{SO}_4^{2-} \rightleftharpoons \text{ZnSO}_4$                                | 2.34    | NIST46.3          |
| $\text{Zn}^{2+} + \text{PO}_4^{3-} + \text{H}^+ \rightleftharpoons \text{ZnHPO}_4$                  | 15.689  | NIST46.8          |
| $\text{Zn}^{2+} + \text{PO}_4^{3-} + 2\text{H}^+ \rightleftharpoons \text{ZnH}_2\text{PO}_4^+$      | 19.403  | NIST46.8          |
| $\text{Zn}^{2+} + \text{glycine}^- \rightleftharpoons \text{Zn}(\text{glycine})^+$                  | 5.38    | NIST46.6          |

NIST Standard Reference Database 46, Versions, 3, 4; 6; 7, 8; Martell, A.E., Smith, R.M. (eds.), NIST, Gaithersburg, USA

PlumBus82: Plummer, L.N. Busenberg, E.: The solubilities of calcite, aragonite and vaterite in  $\text{CO}_2$ - $\text{H}_2\text{O}$  solutions between 0 and 90 °C, and an evaluation of the aqueous model for the system  $\text{CaCO}_3$ - $\text{CO}_2$ - $\text{H}_2\text{O}$ . *Geochim. Cosmochim. Acta* **46**, 1011–1040 (1982)

Turner et al. 1981: Turner, D.R., Whitfield, M., Dickson, A.G.: The equilibrium speciation of dissolved components in fresh water and sea water at 25 °C and 1 atm pressure. *Geochim. Cosmochim. Acta* **45**, 855–881 (1981)

Table S2 Thermodynamic formation constants of the solids used in calculation

| Solid phase                                                           | Reaction                                                                                                                                         | log K   | Source of log K           |
|-----------------------------------------------------------------------|--------------------------------------------------------------------------------------------------------------------------------------------------|---------|---------------------------|
| Halite                                                                | $\text{NaCl} = \text{Na}^+ + \text{Cl}^-$                                                                                                        | 1.550   | NIST 46.8                 |
| Natron                                                                | $\text{Na}_2\text{CO}_3 \cdot 10\text{H}_2\text{O} = 2\text{Na}^+ + \text{CO}_3^{2-} + 10\text{H}_2\text{O}$                                     | -1.311  | MTQ 3.11                  |
| Nahcolite                                                             | $\text{NaHCO}_3 = \text{Na}^+ + \text{HCO}_3^-$                                                                                                  | -0.548  | Wateq 4f                  |
| Trona                                                                 | $\text{NaHCO}_3 \cdot \text{Na}_2\text{CO}_3 \cdot 2\text{H}_2\text{O} = 2\text{H}_2\text{O} + 3\text{Na}^+ + \text{CO}_3^{2-} + \text{HCO}_3^-$ | -0.795  | Wateq 4f                  |
| Mirabilite                                                            | $\text{Na}_2\text{SO}_4 \cdot 10\text{H}_2\text{O} = 2\text{Na}^+ + \text{SO}_4^{2-} + 10\text{H}_2\text{O}$                                     | -1.114  | MTQ 3.11                  |
| Thenardite                                                            | $\text{Na}_2\text{SO}_4 = 2\text{Na}^+ + \text{SO}_4^{2-}$                                                                                       | 0.3217  | NIST 13.1                 |
|                                                                       |                                                                                                                                                  |         |                           |
| Mg(OH) <sub>2</sub> (active)                                          | $\text{Mg(OH)}_2 + 2\text{H}^+ = \text{Mg}^{2+} + 2\text{H}_2\text{O}$                                                                           | 18.794  | NIST 46.7                 |
| Artinite                                                              | $\text{MgCO}_3 \cdot \text{Mg(OH)}_2 \cdot 3\text{H}_2\text{O} + 2\text{H}^+ = 2\text{Mg}^{2+} + \text{CO}_3^{2-} + 5\text{H}_2\text{O}$         | 9.6     | MTQ 3.11                  |
| Hydromagnesite                                                        | $\text{Mg}_5(\text{CO}_3)_4(\text{OH})_2 \cdot 4\text{H}_2\text{O} + 2\text{H}^+ = 5\text{Mg}^{2+} + 4\text{CO}_3^{2-} + 6\text{H}_2\text{O}$    | -8.766  | MTQ 3.11                  |
| Magnesite                                                             | $\text{MgCO}_3 = \text{Mg}^{2+} + \text{CO}_3^{2-}$                                                                                              | -7.46   | NIST 46.7                 |
| Nesquehonite                                                          | $\text{MgCO}_3 \cdot 3\text{H}_2\text{O} = \text{Mg}^{2+} + \text{CO}_3^{2-} + 3\text{H}_2\text{O}$                                              | -4.67   | NIST 46.7                 |
| Huntite                                                               | $\text{CaMg}_3(\text{CO}_3)_4 = 3\text{Mg}^{2+} + \text{Ca}^{2+} + 4\text{CO}_3^{2-}$                                                            | -29.968 | MTQ 3.11                  |
| Epsomite                                                              | $\text{MgSO}_4 \cdot 7\text{H}_2\text{O} = \text{Mg}^{2+} + \text{SO}_4^{2-} + 7\text{H}_2\text{O}$                                              | -2.1265 | NIST 2.1.1                |
| Mg <sub>3</sub> (PO <sub>4</sub> ) <sub>2</sub>                       | $\text{Mg}_3(\text{PO}_4)_2 = 3\text{Mg}^{2+} + 2\text{PO}_4^{3-}$                                                                               | -23.28  | NIST 46.7                 |
| MgHPO <sub>4</sub> ·3H <sub>2</sub> O                                 | $\text{MgHPO}_4 \cdot 3\text{H}_2\text{O} = \text{Mg}^{2+} + \text{H}^+ + \text{PO}_4^{3-} + 3\text{H}_2\text{O}$                                | -18.175 | NIST 46.7                 |
|                                                                       |                                                                                                                                                  |         |                           |
| Portlandite                                                           | $\text{Ca(OH)}_2 + 2\text{H}^+ = \text{Ca}^{2+} + 2\text{H}_2\text{O}$                                                                           | 22.804  | NIST 46.7                 |
| Aragonite                                                             | $\text{CaCO}_3 = \text{Ca}^{2+} + \text{CO}_3^{2-}$                                                                                              | -8.3    | PlumBus82                 |
| Gypsum                                                                | $\text{CaSO}_4 \cdot 2\text{H}_2\text{O} = \text{Ca}^{2+} + \text{SO}_4^{2-} + 2\text{H}_2\text{O}$                                              | -4.61   | PlumBus82                 |
| Hydroxylapatite                                                       | $\text{Ca}_5(\text{PO}_4)_3(\text{OH}) = 5\text{Ca}^{2+} + 3\text{PO}_4^{3-} + \text{OH}^-$                                                      | -58.4   | Tung 88                   |
| CaHPO <sub>4</sub> ·2H <sub>2</sub> O                                 | $\text{CaHPO}_4 \cdot 2\text{H}_2\text{O} = \text{Ca}^{2+} + \text{H}^+ + \text{PO}_4^{3-} + 2\text{H}_2\text{O}$                                | -18.995 | NIST 46.4                 |
| Ca <sub>4</sub> H(PO <sub>4</sub> ) <sub>3</sub> ·2.5H <sub>2</sub> O | $\text{Ca}_4\text{H}(\text{PO}_4)_3 \cdot 2.5\text{H}_2\text{O} = 4\text{Ca}^{2+} + \text{H}^+ + 3\text{PO}_4^{3-} + 2.5\text{H}_2\text{O}$      | -48.30  | McD 77                    |
| Ca <sub>3</sub> (PO <sub>4</sub> ) <sub>2</sub> (am)                  | $\text{Ca}_3(\text{PO}_4)_2 = 3\text{Ca}^{2+} + 2\text{PO}_4^{3-}$                                                                               | -25.8   | CHRIS 90                  |
| Whitlockite                                                           | $\text{Ca}_9\text{Mg}(\text{HPO}_4)(\text{PO}_4)_6 = 9\text{Ca}^{2+} + \text{Mg}^{2+} + \text{H}^+ + 7\text{PO}_4^{3-}$                          | -106.34 | Hamad and Heughebaert, 86 |
|                                                                       |                                                                                                                                                  |         |                           |
| Zn(OH) <sub>2</sub> (am)                                              | $\text{Zn(OH)}_2 + 2\text{H}^+ = \text{Zn}^{2+} + 2\text{H}_2\text{O}$                                                                           | 12.474  | NIST 46.4                 |
| Zn(OH) <sub>2</sub> (epsilon)                                         | $\text{Zn(OH)}_2 + 2\text{H}^+ = \text{Zn}^{2+} + 2\text{H}_2\text{O}$                                                                           | 11.534  | NIST 46.4                 |
| Zn <sub>2</sub> (OH) <sub>3</sub> Cl                                  | $\text{Zn}_2(\text{OH})_3\text{Cl} + 3\text{H}^+ = 2\text{Zn}^{2+} + 3\text{H}_2\text{O} + \text{Cl}^-$                                          | 15.191  | NIST 46.4                 |
| Zn <sub>5</sub> (OH) <sub>8</sub> Cl <sub>2</sub>                     | $\text{Zn}_5(\text{OH})_8\text{Cl}_2 + 8\text{H}^+ = 5\text{Zn}^{2+} + 8\text{H}_2\text{O} + 2\text{Cl}^-$                                       | 38.5    | MTQ 3.11                  |

|                                                                    |                                                                                                                    |         |            |
|--------------------------------------------------------------------|--------------------------------------------------------------------------------------------------------------------|---------|------------|
| ZnCl <sub>2</sub>                                                  | $\text{ZnCl}_2 = \text{Zn}^{2+} + 2\text{Cl}^-$                                                                    | 7.05    | NIST 2.1.1 |
| Zn <sub>2</sub> (OH) <sub>2</sub> SO <sub>4</sub>                  | $\text{Zn}_2(\text{OH})_2\text{SO}_4 + 2\text{H}^+ = 2\text{Zn}^{2+} + 2\text{H}_2\text{O} + \text{SO}_4^{2-}$     | 7.5     | MTQ 3.11   |
| Zn <sub>4</sub> (OH) <sub>6</sub> SO <sub>4</sub>                  | $\text{Zn}_4(\text{OH})_6\text{SO}_4 + 6\text{H}^+ = 4\text{Zn}^{2+} + 6\text{H}_2\text{O} + \text{SO}_4^{2-}$     | 28.4    | MTQ 3.11   |
| Zn <sub>3</sub> O(SO <sub>4</sub> ) <sub>2</sub>                   | $\text{Zn}_3\text{O}(\text{SO}_4)_2 + 2\text{H}^+ = 3\text{Zn}^{2+} + 2\text{SO}_4^{2-} + \text{H}_2\text{O}$      | 18.9135 | NIST 2.1.1 |
| Zincosite                                                          | $\text{ZnSO}_4 = \text{Zn}^{2+} + \text{SO}_4^{2-}$                                                                | 3.9297  | NIST 13.1  |
| ZnSO <sub>4</sub> ·1H <sub>2</sub> O                               | $\text{ZnSO}_4 \cdot 1\text{H}_2\text{O} = \text{Zn}^{2+} + \text{SO}_4^{2-} + \text{H}_2\text{O}$                 | -0.638  | NIST 2.1.1 |
| Bianchite                                                          | $\text{ZnSO}_4 \cdot 6\text{H}_2\text{O} = \text{Zn}^{2+} + \text{SO}_4^{2-} + 6\text{H}_2\text{O}$                | -1.765  | MTQ 3.11   |
| Goslarite                                                          | $\text{ZnSO}_4 \cdot 7\text{H}_2\text{O} = \text{Zn}^{2+} + \text{SO}_4^{2-} + 7\text{H}_2\text{O}$                | -2.0112 | NIST 2.1.1 |
| Zn <sub>3</sub> (PO <sub>4</sub> ) <sub>2</sub> ·4H <sub>2</sub> O | $\text{Zn}_3(\text{PO}_4)_2 \cdot 4\text{H}_2\text{O} = 3\text{Zn}^{2+} + 2\text{PO}_4^{3-} + 4\text{H}_2\text{O}$ | -35.42  | NIST 46.7  |

## References

NIST Standard Reference Database 46, Versions, 3, 4, 7, 8; A.E. Martell, R.M. Smith (Eds.); Database 13 version 1 and NIST CRITICAL database version 2.1.1, NIST, Gaithersburg, USA.

MTQ 3.11 - US-EPA Minteq v. 3.11, US Environmental Protection Agency, CEAM, College Station Road, Athens, GH 30613-0801(1991)

Wateq 4f - Ball, J.W., Nordstrom, D.K.: WATEQ4F-User's manual, U.S., Geological Survey Open-File Report 90-129, (1991)

PlumBus82, Plummer, L.N., Busenberg, E.: The solubilities of calcite, aragonite and vaterite in CO<sub>2</sub>-H<sub>2</sub>O solutions between 0 and 90°C, and an evaluation of the aqueous model for the system CaCO<sub>3</sub>-CO<sub>2</sub>-H<sub>2</sub>O. *Geochim. Cosmochim. Acta* 46, 1011-1040 (1982)

Tung, M.S., Eidelman, N., Sieck, B.; Brown, W.E: Octacalcium Phosphate Solubility Product from 4 to 37°C, *Journal of Research of the National Institute of Standards and Technology*. 93, 613-624 (1988)

McD 77 - McDowell, H., Gregory, T.M., Brown, W.E.: Solubility of Ca<sub>5</sub>(PO<sub>4</sub>)<sub>3</sub>OH in the system Ca(OH)<sub>2</sub> - H<sub>3</sub>PO<sub>4</sub> - H<sub>2</sub>O at 5, 15, 25, and 37 degree. C. *Journal of Research of the National Bureau of Standards, Section A: Physics and Chemistry*. 81A, 273-281 (1977).

CHRIS 90 - Christoffersen, M.R., Christoffersen, J., Kibalczyk, W.: Apparent solubilities of two amorphous calcium phosphates and of octacalcium phosphate in the temperature range 30-42°C. *Journal of Crystal Growth* 106, 349-354 (1990).

Hamad and Heughebaert, 86 - Hamad M., Heughebaert J.C.: The growth of whitlockite, *Journal of Crystal Growth*, 79, 192–197, (1986)
